# Supplementary material for: Embryo Transfer Procedural Parameters Do Not Predict IVF Cycle Outcome
Source: MDPI journal article supplement (doi:10.3390/jcm13051312), 2024-02-26
Supplement: s1 [file s1]

Supplementary Table S1: Results of the logistic regression on the positive hCG outcome

|                         | Estimate | Std. Error | z value | P-Value           |
|-------------------------|----------|------------|---------|-------------------|
| Maternal Age            | -0.6232  | 0.2568     | -2.935  | <b>0.0032</b>     |
| Day of ET               | 4.2762   | 4.7258     | 0.896   | 0.3712            |
| Physician               | -1.4538  | 1.1050     | -0.548  | 0.6978            |
| Embryologist            | 0.7914   | 0.6982     | 0.994   | 0.3298            |
| Mild Bleeding           | -0.0359  | 0.1900     | -0.1890 | 0.8500            |
| Significant Bleeding    | 0.5728   | 0.6451     | 0.8880  | 0.3752            |
| Mild Resistance         | -0.1203  | 0.2478     | -0.4860 | 0.6277            |
| Significant Resistance  | -0.6758  | 0.5115     | -1.3210 | 0.1863            |
| Catheter Reload         | -0.4233  | 0.7910     | -0.5350 | 0.5934            |
| Employment of Tenaculum | -0.3417  | 0.3265     | -1.0460 | 0.2956            |
| Mild Discomfort         | 0.3988   | 0.7218     | 0.5520  | 0.5811            |
| Significant Discomfort  | 0.0213   | 0.3371     | 0.0630  | 0.9504            |
| Presence of Mucus       | -0.3632  | 0.3130     | -1.1600 | 0.2469            |
| Poor Quality Embryo     | -0.7170  | 0.1655     | -4.3330 | <b>&lt;0.0001</b> |
| Good Quality Embryo     | -0.2570  | 0.1795     | -1.4320 | 0.1522            |
| Number of Embryos       | 0.1088   | 0.0794     | 1.3700  | 0.1713            |

Supplementary Table S2: Results of the logistic regression on the clinical pregnancy outcome

|                         | Estimate | Std. Error | z value | P-Value       |
|-------------------------|----------|------------|---------|---------------|
| Maternal Age            | -0.6132  | 0.2412     | -2.879  | <b>0.0037</b> |
| Day of ET               | 1.5510   | 0.5889     | 2.634   | <b>0.0084</b> |
| Physician               | -1.3985  | 1.3995     | -0.378  | 0.7523        |
| Embryologist            | 0.7345   | 0.5863     | 1.187   | 0.2731        |
| Mild Bleeding           | -0.0971  | 0.1960     | -0.4960 | 0.6202        |
| Significant Bleeding    | -1.0466  | 0.9056     | -1.1560 | 0.2479        |
| Mild Resistance         | 0.5285   | 0.2644     | 1.9990  | 0.0456        |
| Significant Resistance  | -0.6111  | 0.5726     | -1.0670 | 0.2859        |
| Catheter Reload         | 0.1264   | 0.8280     | 0.1530  | 0.8787        |
| Employment of Tenaculum | 0.2978   | 0.3497     | 0.8520  | 0.3944        |

|                        |         |        |         |                   |
|------------------------|---------|--------|---------|-------------------|
| Mild Discomfort        | 0.2375  | 0.7795 | 0.3050  | 0.7606            |
| Significant Discomfort | -0.0629 | 0.3650 | -0.1720 | 0.8631            |
| Presence of Mucus      | -0.3746 | 0.3230 | -1.1600 | 0.2461            |
| Poor Quality Embryo    | -0.8932 | 0.1806 | -4.9450 | <b>&lt;0.0001</b> |
| Good Quality Embryo    | 0.2021  | 0.1914 | 1.0560  | 0.2908            |
| Number of Embryos      | 0.0619  | 0.0843 | 0.7330  | 0.4633            |
